# Supplementary material for: Reaction of benzoxasilocines with aromatic aldehydes: Synthesis of homopterocarpans
Source: Beilstein J Org Chem. 2007 Feb 8;3:5. doi: 10.1186/1860-5397-3-5 (PMC1810298; doi:10.1186/1860-5397-3-5)
Supplement: File 1 — Experimental data. This file contains all experimental methods and analytical data belonging to the compounds described in the article. [file Beilstein_J_Org_Chem-03-05-s001.doc]

**Reaction of benzoxasilocines with aromatic aldehydes.**

**Synthesis of homopterocarpans**

Míriam Álvarez-Corral, Cristóbal López-Sánchez, Leticia Jiménez-González, Antonio Rosales, Manuel Muñoz-Dorado and Ignacio Rodríguez-García*

**Additional material:**

**Experimental**

**General**

Infrared spectra were recorded in liquid film between NaCl plates on a FT-IR Mattson Genesis II. NMR spectra were determined on a Bruker Avance DPX 300 and Bruker Avance-500. 1H NMR and 13C NMR spectra were recorded in deuterated solvent and are reported to tetramethylsilane. Carbon substitution degrees were established by DEPT multipulse sequence, and 13C NMR peak assignments were made with the aid of 2D NMR (HMBC, HMQC, COSY and NOESY). HRMS were registered on an Autospec-Q VG Analytical (FISONS) mass spectrometer. All solvents were purified and dried following standard procedures[[1]](#footnote-2).

**Allyl-(2-allylphenoxy)-dimethylsilane (4)**

Commercially available 2-allylphenol(**3**) (2g, 14.9mmol) was dissolved in anhydrous CH2Cl2 (75 mL) at 0ºC under N2 atmosphere. Anhydrous NEt3 (2.5 mL, 17.9 mmol) and allylchlorodimethylsilane (2.4 mL, 16.4 mmol) were added. The reaction mixture was stirred at 0ºC for 3h, and then, a saturated solution of NaHCO3/H2O was added The whole mixture was extracted with CH2Cl2 (3 x 50 mL). The organic layer was dried over anhyd. Na2SO4, and concentrated *in vacuo*. Flash chromatography (hexane: Et2O, 9:1) of the residue gave **4** (2.91 g, 12.5 mmol, 85%) as a colourless oil: IR (film) max3076, 2961, 2903, 1631, 1557, 1489, 1451, 1253, 1159, 1040, 920, 834, 756. 1H NMR (CDCl3, 300 MHz) 7.17 (2H, m, H-3, H-5), 6.97 (1H, dt, *J*= 7.2, *J*=1.2 Hz, H-4), 6.85 (1H, dd, *J*=6.9, *J*=1.2 Hz, H-6), 5.94 (2H, m, H-2’,2’’), 5.00 (4H, m, H-3’, H-3’’), 3.40 (2H, d, *J*= 6.9 Hz, H-1’), 1.84 (2H, d, *J*=8.1 Hz, H-1’’), 0.35 (6H, s, -SiCH3). 13C NMR (CDCl3, 75 MHz)  153.00 (C, C-1), 136.97 (CH, C-2’), 133.23 (CH, C-2’’), 130.73 (C, C-6), 130.15 (CH, C-2), 127.08 (CH, C-3), 121.44 (CH, C-4), 118.71 (CH, C-5), 115.41 ( CH2, C-3’), 114.37 (CH2, C-3’’), 34.52 (CH2, C-1’), 24.78 (CH2, C-1’’), -1.59 (2CH3, Si(CH3)2). HREIMS (*m/z*) calcd. for C14H20OSi 232.1283 [M]+, found 232.1285.

**3,6-Dihydro-2,2-dimethyl-2H-benzo[*g*][1,2]oxasilocine (5)**

1,3-Bis-(2,4,6-trimethylphenyl)-2-imidazolidinylidene)dichloro(phenylmethylene)-(tricyclohexylphosphine)ruthenium (2nd generation Grubbs catalyst) (54 mg, 0.06 mmol) was added to a stirred solution 0.02 M of **4** (500 mg, 2.15 mmol) in anhyd. CH2Cl2, under N2 atmosphere. The mixture was stirred under reflux for 3 h, and then, the solvent was removed *in vacuo*. Flash chromatography (hexane: Et2O, 98:2) of the residue gave **5** (400 mg, 1.96 mmol, 91%) as a colourless oil: IR (film) max 2941, 2924, 2871, 2794, 1580, 1484, 1449, 1253, 1035, 925, 842, 800, 751.1H NMR (CDCl3, 300 MHz) 7.14 (2H, m, H-7, H-9), 6.95 (1H, dt, *J*=1.2, *J*= 7.3 Hz, H-8), 6.87 (1H, dd, *J*=1.2, *J*=6.5 Hz, H-10), 5.60 (2H, m, H-4, H-5), 3.36 (2H, d, *J*= 7.7 Hz, H-6), 1.85 (2H, d, *J*=7.3 Hz, H-3), 0.23 (6H, s, Si(CH3)3). 13C NMR (CDCl3, 75 MHz)  152.75 (C, C-10a), 134.45 (C, C-6a), 129.69 (CH,C-9), 128.91 (CH, C-7), 127.19 (CH, C-8), 123.96 (CH, C-10), 122.09 (CH, C-5), 121.35 (CH, C-4), 29.95 (CH2, C-6), 19.23 (CH2, C-3), -1.86 (2CH3, -Si(CH3)2). HREIMS (*m/z*) calcd. for C12H16OSi 204.0970 [M]+, found 204.0968.

**(*Z*)-2-(4-Fluorodimethylsilyl-2-butenyl)phenol (6).**

To a solution of **5** (50 mg, 0.24 mmol) in methanol (0.5 mL) BF3·Et2O (62 μL, 0.49 mmol) was added. The mixture was stirred at room temperature for 5 minutes. After that, the reaction was diluted with CH2Cl2 (10 mL) and washed with brine (5 mL). The organic phase was dried over MgSO4 and evaporated under vacuo to give compound **6** (49mg, 0.22 mmol) in a 95% yield as a colourless oil: IR (film) max 3567, 3528, 3423, 2958, 2926, 2870, 1601, 1579, 1484, 1449, 1381, 1337, 1256, 1212, 1158, 1090, 874, 843, 798 cm-1. 1H NMR (300 MHz, CDCl3): 7.14 (1H, dd, *J*= 8.1, *J*= 7.3 Hz, H-5), 7.13 (1H, d, *J* = 7.3 Hz, H-3), 6.90 (1H, t, *J*= 7.3 Hz, H-4), 6.82 (1H, d, *J*= 8.1 Hz, H-6), 5.63 (2H, m, H-2’, H-3’), 5.06 (1H, bs, OH), 3.41 (2H, d, *J*= 6.5 Hz, H-1’), 1.86 (2H, dd, *J* = 7.3, 3*J*H-F = 6.5 Hz, H-4´), 0.30 (6H, d, 3*J*H-F = 7.3 Hz, (CH3)2SiF). 19FNMR (289 MHz, CDCl3): -160.73 (hept t, 3*J*F-H = 7.3 Hz, 3*J*F-H = 6.5 Hz). 13C NMR (75 MHz, CDCl3): 154.02 (C, C-1), 129.98* (CH, C-3), 127.55* (CH, C-5), 126.66 (CH, C-3´), 126.37 (C, C-2), 125.04 (CH, C-2’), 120.79 (CH, C-4), 115.63 (CH, C-6), 28.35 (CH2, C-1’), 18.50 (CH2, d, 2*J*C-F = 13.5 Hz, C-4´), -1.54 (CH3, d, 2*J*C-F = 14.8 Hz, C-4´). (*may be interchanged). HREIMS (*m/z*) calcd. for C12H17OSiF 224,1033 [M]+, found 224.1030.

**General procedure for the Sakurai reaction in DCM:** To a stirred solution of the corresponding benzoxasilocine in anhyd. CH2Cl2 (4 mL/mmol) under N2 atmosphere at ‑45 ºC, BF3·Et2O (2 equiv.) was added. After 5 min, a solution of the aldehyde(1.1 equiv.) in CH2Cl2 was added dropwise. The reaction mixture was stirred at –45 ºC for 2 h. and was allowed to warm to room temperature; afterwards was heated to reflux for 4-10 h., then diluted with CH2Cl2 and washed with brine. The dried (Na2SO4) extract was concentrated *in vacuo* and the *cis/trans* relative ratio was measured from 1H NMR. The major isomers were purified by chromatography over silica gel.

**General procedure for the Sakurai reaction in CHCl3:** To a stirred solution of the corresponding benzoxasilocine in anhyd. CHCl3 (7 mL/mmol) under N2 atmosphere at ‑45 ºC, BF3·Et2O (2 equiv.) was added. After 5 min, a solution of the aldehyde(1.1 equiv.) in CHCl3 was added dropwise. The reaction mixture was stirred at room temperature for 24h., then diluted with CH2Cl2 and washed with brine. The dried (Na2SO4) extract was concentrated *in vacuo* and the *cis/trans* relative ratio was measured from 1H NMR. The major isomers were purified by chromatography over silica gel.

***cis* and *trans* 2-phenyl-3-vinyl-2,3-dihydrobenzopyran(7a).**

Reaction of benzoxasilocine (**5**) (132mg, 0.65mmol) with benzaldehyde(77 mg, 0.73 mmol)and BF3·Et2O (187 mg, 1.32 mmol) in anhydrous CH2Cl2 (2.5 mL) followed by workup as described above yielded **7a** as a *cis/trans*mixture in a1:3 relative ratio,with an overall yield of 49% (hexane/Et2O, 95:5); IR (film) max: 3066, 3029, 2954, 2854, 1615, 1585, 1488, 1456, 1307, 1240, 1109, 1015, 919, 803, 751. 1H NMR (CDCl3, 300 MHz) *(signals of cis isomer)*:  5.72 (1H, ddd, *J*=8.1, *J*=10.9, *J=* 18.6 Hz, H-1’’), 5.28 (1H, d, *J*=2.7 Hz, H-2), 4.92 (1H, d, *J*=18.6 Hz, H-2’’b), *(signals of trans isomer)*: 5.61 (1H, ddd, *J*=6.9, *J*=10.5, *J=* 17.3 Hz, H-1’’), 5.03 (1H, d, *J*= 18.1 Hz, H-2’’a), 5.00 (1H, d, *J*= 9.7 Hz, H-2’’b), 4.82 (1H, d, *J*=8.9 Hz, H-2), *(signals of both)*: 7.38 (m, H-2’-6’), 7.18 (m, H-5, H-7), 6.90 (m, H-6, H-8), 2.92 (3H, m, H-3, H-4). 13C NMR (CDCl3, 75 MHz): *(signals of trans isomer)*  154.64 (C, C-8a), 139.89 (C, C-1’), 137.52 (CH, C-1’’), 129.34 (CH, C-5), 128.34 (2CH, C-3’, C-5’), 128.12 (CH, C-4’), 127.39 (CH, C-7), 127.24 (2CH, C2’, C-6’), 121.27 (C, C-4a), 120.41 (CH, C-6), 116.52 (CH, C-8), 116.36 (CH2, C-2’’), 81.99 (CH, C-2), 42.44 (CH, C-3), 30.83 (CH2, C-4). HREIMS (*m/z*) calcd. for C17H16O 236.1201 [M]+, found 236.1204.

***cis* and *trans* 2-(2-methoxyphenyl)-3-vinyl-2,3-dihydrobenzopyran****(7b).**

Reaction of benzoxasilocine (**5**) (55 mg, 0.27 mmol) with 2-methoxybenzaldehyde(41 mg, 0.32 mmol)and BF3·Et2O (68 L, 0.54 mmol) in anhydrous CH2Cl2 (2.5 mL) followed by workup as described above yielded **7b** as a *cis/trans*mixture in a1:1 relative ratio,with an overall yield of 51%. (hexane/Et2O, 95:5); IR (film) max: 2952, 2923, 2852, 1620, 1584, 1489, 1459, 1375, 1241, 1105, 1030, 916, 802, 751. 1H NMR (CDCl3, 300 MHz) *(signals of cis isomer)*  7.4 (1H, dd, *J*=1.9, *J*=7.7 Hz, H-6’), 5.78 (1H, ddd, *J*=7.8, *J*= 10.8, *J*=18.1 Hz, H-1’’), 5.56 (1H, d, *J*=2.4 Hz, H-2),4.97 (1H, m, H-2a”), 4.80 (1H, dt, *J*=17.4, *J*= 1.4 Hz, H-2b’’), 3.88 (3H, s, OMe), 3.37 (1H, dd, *J*=16.4, *J*=5.8 Hz, H-4a), 3.04 (1H, m, H-3), 2.89 (1H, m, H-4b), *(signals of trans isomer)*  7.53 (1H, dd, *J*=1.4, *J*=7.7 Hz, H-6’), 5.69 (1H, ddd, *J*=7.7, *J*= 11.2, *J*=18.1 Hz, H-1’’), 5.40 (1H, d, *J*=8.4 Hz, H-2), 4.97 (2H, m, H-2”), 3.84 (3H, s, OMe), 2.85 (3H, m, H-3, H-4), *(signals of both)* 7.32 (1H, m, H-3’), 7.15 (2H, m, H-5, H-7), 7.01 (1H, m, H-4’), 6.92 (3H, m, H-5’, H-6, H-8). HREIMS (*m/z*) calcd. for C18H18O2 266.1307 [M]+, found 266.1309.

***cis* and *trans* 2-(3-methoxyphenyl)-3-vinyl-2,3-dihydrobenzopyran****(7c).**

Reaction of benzoxasilocine (**5**) (85 mg, 0.42 mmol) with 3-methoxybenzaldehyde(63 mg, 0.47 mmol)and BF3·Et2O (106 L, 0.84 mmol) in anhydrous CH2Cl2 (2.5 mL) followed by workup as described above yielded **7c** as a *cis/trans*mixture in a1:3 relative ratio,with an overall yield of 30%. (hexane/Et2O, 95:5); IR (film) max: 3075, 2954, 2925, 2853, 1602, 1586, 1488, 1456, 1435, 1263, 1239, 1109, 1045, 1017, 917, 793, 754, 698. 1H NMR (CDCl3, 300 MHz) *(signals of cis isomer)*  5.74 (1H, ddd, *J*=7.4, *J*=10.4Hz, *J*=17.3 Hz, H-1’’), 5.24 (1H, d, *J*=3.5 Hz, H-2), *(signals of trans isomer)*: 5.62 (1H, ddd, *J*=6.9, *J*=10.4, *J*=17.3 Hz, H-1’’), 4.76 (1H, d, *J*=8.7 Hz, H-2), *(signals of both)*:  7.14 (3H, m, H-5’, H-5, H-7), 6.94 (5H, m, H-6, H-8, H-2’, H-6’, H-4’), 5.04 (2H, m, H-2’’), 3.83 (3H, s, OMe), 2.92 (2H, m, H-4), 2.83 (1H, m, H-3). 13C NMR (CDCl3, 75 MHz)  *(signals of both)*:  159.63 (C, C-3’), 152.22 (C, C-8a), 141.46 (C, C-1’), 137.47 (CH, C-1’’), 129.33 (2CH, C-7, C-5’), 127.38 (CH, C-5), 120.60 (C, C-4a), 120.43 (CH, C-6), 119.67 (CH, C-8), 116.52 (CH2, C-2’’), 116.29 (CH, C-2’), 113.54 (CH, C-4’), 112.80 (CH, C-6’), 81.91 (CH, C-2), 55.19 (CH3, OMe), 42.31 (CH, C-3), 30.76 (CH2,C-4). HREIMS (*m/z*) calcd. for C18H18O2 266.1307 [M]+, found 266.1303.

***cis* and *trans* 2-(4-methoxyphenyl)-3-vinyl-2,3-dihydrobenzopyran****(7d).**

Reaction of benzoxasilocine (**5**) (72 mg, 0.36 mmol) with 4-methoxybenzaldehyde(54 mg, 0.39 mmol)and BF3·Et2O (91L, 0.72 mmol) in anhydrous CH2Cl2 (2 mL) followed by workup as described above yielded **7d** as a *cis/trans*mixture in a1:5 relative ratio,with an overall yield of 48%. The isomers could be separated by CC (hexane/Et2O, 95:5): **7d *cis***: colourless oil; IR (film) max: 3075, 3038, 3001, 2955, 2927, 2836, 1612, 1584, 1514, 1488, 1456, 1304, 1238, 1175, 1109, 1034, 995, 920, 830, 754. 1H NMR (CDCl3, 300 MHz)  7.28 ( 2H, m, H-2’, H-6’), 7.13 (2H, m, H-5, H-7), 6.90 (4H, m, H-3’, H-6, H-8, H-5’), 5.74 (1H, ddd, *J*=7.4, *J*= 10.4, *J*= 17.3 Hz, H-1’’), 5.23 (1H, d, *J*= 2.6 Hz, H-2), 5.02 (1H, d, *J*=10.7 Hz, H-2’’a), 4.94 (1H, dd, *J*=1.3, *J*=17.2 Hz, H-2’’b), 3.83 (3H, s, OMe), 3.23 (1H, dd, *J*=5.4, *J*=16.0 Hz, H-4a), 2.92 (1H, m, H-3), 2.81 (1H, dd, *J*=4.1, *J*=16.0 Hz, H-4b). 13C NMR (CDCl3, 75 MHz)  158.32 (C, C-4’), 154.18 (C, C-8a), 134.98 (CH, C-1’’), 131.34 (C, C-1’), 129.22 (CH, C-5), 126.94 (CH, C-2’, C-6’), 126.84 (CH, C-7), 120.10 (C, C-4a), 119.97 (CH, C-6), 116.71 (CH2, C-2’’), 116.05 (CH, C-8), 112.84 (CH, C-3’, C-5’), 78.65 (CH, C-2), 54.67 (CH3, OMe), 41.18 (CH, C-3), 30.26 (CH2, C-4). HREIMS (*m/z*) calcd. for C18H18O2 266.1307 [M]+, found 266.1310. **7d *trans***: colourless oil; IR (film) max: 3073, 3000, 2955, 2925, 2836, 1611, 1513, 1487, 1456, 1302, 1237, 1174, 1033, 994, 919, 829, 753. 1H NMR (CDCl3, 300 MHz)  7.30 (2H, m, H-2’, H-6’), 7.13 (2H, m, H-5, H-7), 6.91 (4H, m, H-3’, H-5’, H-6, H-8), 5.59 (1H, ddd, *J*=3.9, *J*=10.5, *J*=17.4 Hz, H-1’’), 5.03 (1H, dd, *J*= 1.1, *J*= 17.8 Hz, H-2’’b), 5.00 (1H, d, *J*= 8.9 Hz, H-2’’a), 4.75 (1H, d, *J*=8.9 Hz, H-2), 3.84 (3H, s, -OMe), 2.91 (2H, m, H-4), 2.83 (1H, m, H-3). 13C NMR (CDCl3, 75 MHz)  159.44 (C, C-4’), 154.77 (C, C-8a), 137.68 (CH, C-1’’), 132.07 (C, C-1’), 129.29 (CH, C-5), 128.51 (CH, C-2’, C-6’), 127.33 (CH, C-7), 121.32 (C, C-4a), 120.33 (CH, C-6), 116.53 (CH, C-8), 116.21 (CH2, C-2’’), 113.77 (CH, C-3’, C-5’), 81.67 (CH, C-2), 55.21 (CH3, OMe), 42.36 (CH, C-3), 31.08 (CH2, C-4). HREIMS (*m/z*) calcd. for C18H18O2 266.1307 [M]+, found 266.1304.

***cis* and *trans* 2-(2-pivaloyloxyphenyl)-3-vinyl-2,3-dihydrobenzopyran****(7e).**

Reaction of benzoxasilocine (**5**) (100 mg, 0.5 mmol) with 2-pivaloyloxybenzaldehyde(156 mg, 0.55 mmol)and BF3·Et2O (126 L, 1.0 mmol) in anhydrous CH2Cl2 (3.0 mL) followed by workup as described above yielded **7e** as a *cis/trans*mixture in a1:3 relative ratio,with an overall yield of 48%. The isomers could be separated by CC (hexane/Et2O, 95:5): **7e *cis:*** colourless oil; IR (film) max: 2954, 2925, 2854, 1751, 1487, 1456, 1272, 1235, 1112, 788, 752, 658, 631. 1H NMR (CDCl3, 300 MHz) 7.61 (1H, dd, *J*=1.7, *J*=7.8 Hz, H-6’), 7.30 (2H, m, H-4’, H-5’), 7.19 (2H, m, H-5, H-7), 7.06 (1H, dd, *J*=3.0, *J*=8.0 Hz, H-3’), 6.93 (2H, m, H-6, H-8), 5.71 (1H, ddd, *J*=8.0, *J*=10.4, *J*=16.6 Hz, H-1’’), 5.34 (1H, d, *J*=1.6 Hz, H-2), 4.97 (1H, dd, *J*=1.8, *J*= 9.8 Hz, H-2’’a), 4.83 (1H, dd, *J*=1.5, *J*= 15.4 Hz, H-2’’b), 3.27 (1H, dd, *J*=10.4, *J*=10.4 Hz, H-4a), 2.84 (2H, m, H-3, H-4b), 1.39 (9H, s, C(CH3)3). 13C NMR (CDCl3, 75 MHz) 176.44 (C, C=O), 154.76 (C, C-8a), 147.30 (C, C-2’), 134.46 (CH, C-1’’), 131.74 (C, C-1’), 129.83 (CH, C-5), 128.14 (CH, C-4’), 127.95 (CH, C-6’), 127.25 (CH, C-7), 125.29 (CH, C-5’), 121.79 (CH, C-3’), 120.78 (CH, C-6), 120.22 (C, C-4a), 117.74 (CH2, C-2’’), 116.74 (CH, C-8), 74.49 (CH, C-2), 40.13 (CH, C-3), 39.12 (C, C(CH3)3), 31.78 (CH2, C-4), 27.12 (CH3, (CH3)3). HREIMS (*m/z*) calcd. for C22H24O3 336.1725 [M]+, found 336.1728. **7e *trans***: colourless oil; IR (film) max: 3069, 2958, 2926, 2851, 1752, 1585, 1488, 1456, 1396, 1365, 1273, 1241, 1112, 1030, 1014, 920, 771, 752. 1H NMR (CDCl3, 300 MHz) 7.48 (1H, dd, *J*=2.0, *J*=5.6 Hz, H-6’), 7.36 (1H, dt, *J*=1.6, *J*=7.6 Hz, H-4’), 7.27 (1H, m, H-5’), 7.21 (1H, dd, *J*=1.2, *J*=15.3 Hz, H-5), 7.14 (1H, m, H-7), 7.08 (1H, dd, *J*=1.2, *J*= 6.9 Hz, H-3’), 6.91 (2H, m, H-6, H-8), 5.62 (1H, ddd, *J*=6.4, *J*=10.3, *J*=17.1 Hz, H-1’’), 5.04 (3H, m, H-2’’a, H-2’’b, H-2), 2.89 (3H, m, H-3, H-4), 1.32 (9H, s, C(CH3)3). 13C NMR (CDCl3, 75 MHz) 176.31 (C, C=O), 154.54 (C, C-8a), 148.52 (C, C-2’), 137.10 (CH, C-1’’), 131.93 (C, C-1’), 129.36 (CH, C-5), 128.75 (CH, C-4’), 128.17 (CH, C-6’), 127.45 (CH, C-7), 125.82 (CH, C-5’), 122.44 (CH, C-3’), 121.00( C, C-4a), 120.44 ( CH, C-6), 116.55 (CH, C-8), 116.48 (CH2, C-2’’), 76.34 (CH, C-2), 41.62 (CH, C-3), 39.12 (C, C(CH3)3), 30.56 (CH2, C-4), 27.13 (CH3, C(CH3)3). HREIMS (*m/z*) calcd. for C22H24O3 336.1725 [M]+, found 336.1722.

***cis* and *trans* 2-(3-pivaloyloxyphenyl)-3-vinyl-2,3-dihydrobenzopyran****(7f).**

Reaction of benzoxasilocine (**5**) (64 mg, 0.32 mmol) with 3-pivaloyloxybenzaldehyde(100 mg, 0.35 mmol)and BF3·Et2O (81 L, 0.64 mmol) in anhydrous CH2Cl2 (2.5 mL) followed by workup as described above yielded **7f** as a *cis/trans*mixture in a1:5 relative ratio,with an overall yield of 42%. (hexane/Et2O, 95:5); IR (film) max: 2951, 2923, 2853, 1756, 1560, 1375, 1260, 1238, 1111, 784, 749, 722. 1H NMR (CDCl3, 300 MHz) *(signals of cis isomer)*  5.73 (1H, ddd, *J*=1.2, *J*=8.6, *J*=12.1 Hz, H-1’’), 5.26 (1H, sa, H-2), *(signals of trans isomer)*  5.61 (1H, ddd, *J*=7.1, *J*=10.3, *J*=17.3 Hz, H-1’’), 4.80 (1H, d, *J*=9.5 Hz, H-2), *(signals of both)* 7.83 (1H, t, *J*=7.8 Hz, H-5’), 7.21 (1H, m, H-4’), 7.12 (3H, m, H-5, H-7, H-2’), 7.04 (1H, m, H-6’), 6.91 (2H, m, H-6, H-8), 4.95 (1H, d, *J*=16.1 Hz, H-2’’b), 4.91 (1H, d, *J*=12.0 Hz, H-2’’a), 2.92 (2H, m, H-4), 2.80 (1H, m, H-3), 1.38 (9H, s, C(CH3)3). HREIMS (*m/z*) calcd. for C22H24O3 336.1725 [M]+, found 336.1724.

***cis* and *trans* 2-(4-pivaloyloxyphenyl)-3-vinyl-2,3-dihydrobenzopyran****(7g).**

Reaction of benzoxasilocine (**5**) (100 mg, 0.5 mmol) with 4-pivaloyloxybenzaldehyde(156.2 mg)and BF3·Et2O (126 L, 1.0 mmol) in anhydrous CH2Cl2 (4.0 mL) followed by workup as described above yielded **7g** as a *cis/trans*mixture in a1:3 relative ratio,with an overall yield of 47%. (hexane/Et2O, 95:5); IR (film) max: 3073, 2972, 2927, 2871, 1751, 1641, 1697, 1583, 1507, 1486, 1456, 1275, 1237, 1198, 1165, 1114, 1014, 920, 895, 753. 1H NMR (CDCl3, 300 MHz) *(signals of cis isomer)*  5,72 (1H, ddd, *J*=8.3, *J*=10.5, *J*=17.3 Hz, H-1’’), 5.28 (1H, d, *J*=2.35 Hz, H-2), 4.92 (1H, d, *J*=17.1 Hz, H-2’’b), *(signals of trans isomer)*  5.60 (1H, ddd, *J*=7.3, *J*=10.3, *J*=17.3 Hz, H-1’’), 5.04 (2H, m, H-2’’), 4.81 (1H, d, *J*=8.9 Hz, H-2) *(signals of both)*  7.39 (2H, d,  *J*=7.1 Hz, H-2’,H-6’), 7.10 (4H, m, H-5, H-7, H-3’, H-5’), 6.91 (2H, m, H-6, H-8), 2.92 (2H, m, H-4), 2.80 (1H, m, H-3), 1.38 (9H, s, C(CH3)3). HREIMS (*m/z*) calcd. for C22H24O3 336.1725 [M]+, found 336.1721.

***Trans-*2-(2-pivaloyloxyphenyl)-3-formyl-2,3-dihydrobenzopyran (10)**

Compound **7e** ***trans*** (22 mg, 0.06 mmol) was dissolved in THF/H2O (2 mL, 1:1 v/v) and cooled at 0ºC. The flask was protected from the light. OsO4 (44 L, 0.012 mmol, 2.5% in isopropanol) and NaIO4 (50 mg, 0.23 mmol) were added. The mixture was stirred at 0ºC for 5 h, then water was added and was extracted with Et2O. The dried (Na2SO4) extract was concentrated *in vacuo* and purified by chromatography over silica gel, eluting with hexane/ Et2O 85:15, to give compound **10** (16mg, 0.047 mmol, 79%) as a colourless oil: 1H NMR (CDCl3, 300 MHz) 9.59 (1H, s, -CHO), 7.50 (1H, dd, *J*=1.6, *J*=7.8 Hz, H-6’), 7.41 (1H, dt, *J*=1.8, *J*=7.6 Hz, H-4’), 7.29 (1H, m, H-5’), 7.15 (3H, m, H-7, H-3’, H-5), 6.95 (2H, m, H-6, H-8), 5.45 (1H, d, *J*=7.2 Hz, H-2), 3.16 (3H, m, H-3, H-4), 1.34 (9H, s, C(CH3)3). 13C NMR (CDCl3, 75 MHz) 200.49 (C, C=O), 154.12 (C, C-8a), 147.79 (C, C-2’), 130.93 (C, C-1’), 129.62 (CH, C-5), 129.39 (CH, C-4’), 127.97 (CH, C-6’), 127.75 (CH, C-7), 126.25 (CH, C-5’), 122.79 (CH, C-3’), 121.03(CH, C-6), 120.44 (C, C-4a), 116.77 (CH, C-8), 71.87 (CH, C-2), 49.83 (CH, C-3), 39.19 (C, C(CH3)3), 27.14 (CH3, C(CH3)3), 23.92 (CH2, C-4), (C=O signal of OPiv group is missing). HREIMS (*m/z*) calcd. for C21H22O4 338.1518 [M]+, found 338.1521.

*trans* 3-hidroxymethyl-2-(2-hydroxyphenyl)-2,3-dihydrobenzopyran (8).

Compound **10** (26 mg, 0.08 mmol) was dissolved in anhydrous Et2O (2 mL), and added to a solution of LiAlH4 (9 mg, 0.23 mmol) in EtO2 (2 mL). The reaction mixture was stirred at r.t. for 30 minutes. Then, a saturated solution of NH4Cl/H2O (6 mL) was added, and the solution was extracted with CH2Cl2. The organic layer was dried over anhyd. Na2SO4, and the solvent removed *in vacuo*. Flash chromatography of the residue (hexane: Et2O 4:6) afforded **8** (15 mg, 0.06 mmol, 76%) as a solid foam: 1H NMR (CDCl3, 300 MHz) 7.50 (1H, dd, *J*=1.6, *J*=7.8 Hz, H-6’), 7.41 (1H, dt, *J*=1.8 Hz, *J*=7.6 Hz, H-4’), 7.29 (1H, m, H-5’), 7.15 (3H, m, H-7, H-3’, H-5), 6.95 (2H, m, H-6, H-8), 5.23 (1H, d, *J*=9.9 Hz, H-2), 3.62 (2H, ddd, *J*=3.4, *J*=12.2, *J*=16.02 Hz, H-1’’), 3.19 (1H, dd, *J*=4.8, *J*=11.5 Hz, H-4), 2.88 (1H, dd, *J*=4.9, *J*=11.4 Hz, H-4), 2.35 (1H, m, H-3). 13C NMR (CDCl3, 75 MHz) (DEPT)  129.71 (CH, C-6’), 129.51 (CH, C-5), 127.82 (CH, C-4’), 127.29 (CH, C-7), 121.13 (CH, C-6), 121.03 (CH, C-5’), 117.16 (CH, C-8), 116.77 (CH, C-3’), 77.06 (CH, C-2), 63.36 (CH2, C-1’’), 39.50 (CH, C-3), 27.98 (CH2, C-4). HREIMS (*m/z*) calcd. for C16H16O3 256.1099 [M]+, found 256.1095.

***trans*-Homopterocarpan**

(*trans***-**6a,12a-dihydro- 6H,7H-[1]benzopyrano[4,3-*b*][1]benzopyran)

To a solution of **8** (10 mg, 0.03 mmol) in anhyd. THF (1 mL), PPh3 (18 mg, 0.07 mmol) and DIAD (14 mg, 0.07 mmol), were added. After 30 min., the solvent was removed *in vacuo.* Flash chromatography (hexane:Et2O 85:15) of the residue afforded **9** (4 mg, 0.016 mmol, 56%): 1H NMR (CDCl3, 500 MHz) 7.69 (1H, td, *J*= 7.7, *J*= 1.3 Hz, H-1), 7.25 ( 1H, tt, *J*= 7.7*, J*= 0.84 Hz, H-3), 7.19 ( 1H, t, *J*= 8.1 Hz, H-10), 7.04 (1H, d, *J*= 7.5 Hz, H-8), 7.02 (2H, m, H-11, H-4), 6.95 (1H, dt, *J*= 1.2, *J*= 7.4 Hz, H-9), 6.88 (1H, dd, *J*= 0.9 Hz, *J*= 8.2 Hz, H-2), 4.90 (1H, d, *J*= 10.3 Hz, H-12a), 4.47 (1H, dd*, J*= 3.8 Hz, *J*= 11.2 Hz, H-6a), 3.98 (1H, t, *J*= 11.2 Hz, H-6), 2.89 (1H, dd, *J*= 3.0 Hz, *J*=10.7 Hz, H-7’), 2.68 (1H, dd, *J*= 3.48, *J*= 12.2 Hz, H-7), 2.48 (1H, m, H-6a).13C NMR (CDCl3, 125 MHz) 154.93 (C, C-11a), 154.17 (C, C-4a), 129.91 (CH, C-8), 129.20 (CH, C-3), 127.61 (CH, C-10), 126.58 (CH, C-1), 121.89 (C, C-12b), 120.96 (CH, C-9), 120.74 (CH, C-4), 120.74 (C, C-7a), 117.36 (CH, C-11), 116.42 (CH, C-2), 73.25 (CH, C-12a), 68.27 (CH2, C-6), 32.51 (CH, C-6a), 27.63 (CH2, C-7).HREIMS (*m/z*) calcd. for C16H14O2 238.0994 [M]+, found 238.0998.

19F NMR

1. Casey, M.; Leonard, J.; Lygo, B.; Procter, G. “Advanced Practical Organic Chemistry” Chapman and Hall, New York, 1990. [↑](#footnote-ref-2)
